# Supplementary material for: Spinal Shox2 interneuron interconnectivity related to function and development
Source: eLife. 2018 Dec 31;7:e42519. doi: 10.7554/eLife.42519 (PMC6333440; doi:10.7554/eLife.42519)
Supplement: Figure 2—source data 1. [file elife-42519-fig2-data1.xlsx]

## Sheet: Sheet1
Raw data EPSC latency (ms)
Number of pairs	Unidirectional	Bidirectional
1	5.3	0.7
2	7.3	1.5
3	2.5	0.6
4		0.2
5		1.3
6		2.2
7		0.3
8		0.3
9		0.8
10		0.5
11		0.3
12		0.2
13		0.1
14		0.9
15		0
16		0.7
17		0.8
18		1
19		0.9
20		0.1
21		0.6
22		0.1
23		0.2
24		0.4
25		0.2
26		0.9
Mean	5.03333	0.607692
