# Supplementary material for: Spinal Shox2 interneuron interconnectivity related to function and development
Source: eLife. 2018 Dec 31;7:e42519. doi: 10.7554/eLife.42519 (PMC6333440; doi:10.7554/eLife.42519)
Supplement: Figure 2—source data 2. [file elife-42519-fig2-data2.xlsx]

## Sheet: Sheet1
Raw data EPSP latency (ms)
Number of pairs	Unidirectional	Bidirectional
1	4.2	-3.9
2	1.7	-8.4
3	0	-7.2
4		-9
5		-7.9
6		-8.4
7		-8.5
8		-9.8
9		-8.5
10		-9.4
11		-9.8
12		-8.6
13		-10.2
14		-7.9
15		-9.2
Mean	1.96667	-8.44667
