# Supplementary material for: Spinal Shox2 interneuron interconnectivity related to function and development
Source: eLife. 2018 Dec 31;7:e42519. doi: 10.7554/eLife.42519 (PMC6333440; doi:10.7554/eLife.42519)
Supplement: Figure 5—source data 2. [file elife-42519-fig5-data2.xlsx]

## Sheet: Sheet1
Cell	0.2Hz (deg)	1Hz (deg)	2Hz (deg)	5Hz (deg)	10Hz (deg)	20Hz (deg)
1			30.68	62.613	73.224
2			26.08	47.673	70.902	97.38
3			22.96	46.098	66.3841	89.235
4			39.05	71.1	103.08	110.52
5			51.51	79.632	83.9	82.56
6			47	70.749	85.7161	114.223
7			41.93	68.283
8			36.32	87.012	99.7921	113.451
9		8.96	19.43	39.888	55.746
10		21.4	38.83	56.214	77.724	110.052
11		12.91	29.25	54.6
12		4.93	13.97	84.24
13	0.44	8.5	32.18
14	0.42
