# Supplementary material for: Spinal Shox2 interneuron interconnectivity related to function and development
Source: eLife. 2018 Dec 31;7:e42519. doi: 10.7554/eLife.42519 (PMC6333440; doi:10.7554/eLife.42519)
Supplement: Figure 7—source data 2. [file elife-42519-fig7-data2.xlsx]

## Sheet: Sheet1
EPSP (mV)	Cell	Neonates	Juvenile	Adolescence
	1	0.307	0.559	0.287
	2	1.959	0.881	0.126
	3	0.857	3.025	0.152
	4	0.244	2.841	0.132
	5	3.547	0.159
	6	1.863	0.34
	7	0.152	0.62
	8	0.321
	9	2.538
	10	1.719
	11	0.721
	12	1.678
	13	0.537
	14	0.539
	15	0.576
	16	0.393
	17	0.719
	18	1.99
	19	0.363
	20	3.011
	21	1.388
