# Supplementary material for: Spinal Shox2 interneuron interconnectivity related to function and development
Source: eLife journal article supplement (doi:10.7554/elife.42519), 2018-12-31
Supplement: supp [file elife_poa_e42519_Figure_3_source_data_1.xlsx]

## Sheet: Sheet1
Number of pairs	Coupling coefficient	Coupling coefficient (%)
1	0.162758	16.2758
2	0.0313175	3.13175
3	0.163273	16.3273
4	0.119595	11.9595
5	0.123694	12.3694
6	0.0606061	6.06061
7	0.245464	24.5464
8	0.095114	9.5114
9	0.0967742	9.67742
10	0.283893	28.3893
11	0.0376952	3.76952
12	0.115813	11.5813
13	0.037694	3.7694
14	0.0827389	8.27389
15	0.0653427	6.53427
16	0.146373	14.6373
17	0.155891	15.5891
18	0.0296984	2.96984
19	0.0172043	1.72043
20	0.0646837	6.46837
21	0.0699659	6.99659
22	0.313965	31.3965
23	0.187708	18.7708
24	0.20298	20.298
25	0.0864118	8.64118
26	0.0611222	6.11222
27	0.125892	12.5892
28	0.194969	19.4969
29	0.245919	24.5919
30	0.195008	19.5008
31	0.272793	27.2793
32	0.150485	15.0485
33	0.0833333	8.33333
Mean	0.131096	13.1096
