# Supplementary material for: Spinal Shox2 interneuron interconnectivity related to function and development
Source: eLife journal article supplement (doi:10.7554/elife.42519), 2018-12-31
Supplement: supp [file elife_poa_e42519_Figure_3_source_data_2.xlsx]

## Sheet: Sheet1
Unidirectional	DH-removed (µm)	Slices (µm)		Bidirectional	DH-removed (µm)	Slices (µm)		Non-connected	DH-removed (µm)	Slices (µm)
	32.291	25.106			38.361	47.255			115.285	33.368
	65.394	47.822			70.431	84.066			54.509	40.05
					69.712	55.446			40.18	55.298
					41.641	38.361			91.845	66.689
					28.143	64.746			26.733	69.071
					84.247	30.191			61.115	38.756
					42.033	41.217			44.812	49.413
					70.151	40.064				66.266
						22.756				35.241
						65.447				60.942
						38.756				49.008
						23.164				45.667
						49.413				39.504
						32.182				60.324
						40.442				23.012
						36.386
						22.756
						19.42
						30.152
						40.18
						24.919
						26.068
						24.919
						64.601
						78.053
						24.203
						22.601
						19.18
						20.134
						54.25
						34.907
						35.604
						32.867
						25.477
						38.391
						101.769
						42.559
