# Supplementary material for: Spinal Shox2 interneuron interconnectivity related to function and development
Source: eLife journal article supplement (doi:10.7554/elife.42519), 2018-12-31
Supplement: supp [file elife_poa_e42519_Figure_4_source_data_1.xlsx]

## Sheet: Sheet1
1st EPSP	Cell	Control (mV)	CNQX+APV (mV)			5st EPSP	Cell	Control (mV)	CNQX+APV (mV)
	1	2.92517	2.72491				1	5.91752	4.46612
	2	0.150203	0.231085				2	0.605369	0.629139
	3	1.1703	1.29702				3	1.9612	2.15998
	4	0.507717	0.363767				4	1.77674	0.790085
	5	2.23147	2.05197				5	6.20922	5.30831
