# Supplementary material for: Spinal Shox2 interneuron interconnectivity related to function and development
Source: eLife journal article supplement (doi:10.7554/elife.42519), 2018-12-31
Supplement: supp [file elife_poa_e42519_Figure_4_source_data_2.xlsx]

## Sheet: Sheet1
1st EPSP	Cell	Control (mV)	Carbenoxolone (mV)			5st EPSP	Cell	Control (mV)	Carbenoxolone (mV)
	1	2.09898	0.49168				1	6.18384	1.77373
	2	1.382	0.247354				2	4.44337	0.85327
	3	3.58279	0.578435				3	9.86972	1.79986
	4	0.452672	0.114618				4	0.927178	0.229206
	5	1.7784	0.211038				5	4.73492	0.525413
