# Supplementary material for: Spinal Shox2 interneuron interconnectivity related to function and development
Source: eLife journal article supplement (doi:10.7554/elife.42519), 2018-12-31
Supplement: supp [file elife_poa_e42519_Figure_5_source_data_1.xlsx]

## Sheet: Sheet1
Cell	0.2Hz (%)	1Hz (%)	2Hz (%)	5Hz (%)	10Hz (%)	20Hz (%)			Normalized to 2Hz	Cell	0.2Hz	1Hz	2Hz	5Hz	10Hz	20Hz
1			25.8997	11.5439	2.92683					1			1	0.445716	0.113006
2			6.67775	2.72441	1.59845	0.597477				2			1	0.407982	0.239369	0.0894727
3			27.6446	11.6561	6.94362	5.18457				3			1	0.421641	0.251174	0.187543
4			7.30331	1.89822	1.51893	0.447298				4			1	0.259913	0.207978	0.0612459
5			6.83784	1.50068	0.839577	2.3103				5			1	0.219467	0.122784	0.337869
6			4.1142	2.90558		0.631391				6			1	0.706231		0.153466
7			0.824285	0.475051						7			1	0.576319
8			2.0143	1.61525	0.769053	0.783924				8			1	0.801889	0.381796	0.389179
9		12.6951	10.5746	6.54701	4.65809					9		1.20052	1	0.619126	0.440498
10		10.4626	7.92743	2.70374	1.84459	1.10637				10		1.31979	1	0.341062	0.232685	0.139563
11	15.2971	9.48269	6.37326	4.16996						11	2.40021	1.48789	1	0.654291
12	11.3341	7.56206	5.27504	4.75023						12	2.14863	1.43356	1	0.900511
13	3.90373	3.48296	2.58507							13	1.51011	1.34734	1
