# Supplementary material for: Spinal Shox2 interneuron interconnectivity related to function and development
Source: eLife journal article supplement (doi:10.7554/elife.42519), 2018-12-31
Supplement: supp [file elife_poa_e42519_Figure_7_source_data_1.xlsx]

## Sheet: Sheet1
Coupling coefficient (%)	Cell	Neonates	Juvenile	Adolescence
	1	16.2758	1.35747	2.56724
	2	3.13175	10.0496	7.17345
	3	16.3273	10.2135	5.58413
	4	11.9595	29.1938
	5	12.3694	25.655
	6	6.06061	6.52423
	7	24.5464	19.1994
	8	9.5114	1.22137
	9	9.67742
	10	28.3893
	11	3.76952
	12	11.5813
	13	3.7694
	14	8.27389
	15	6.53427
	16	14.6373
	17	15.5891
	18	2.96984
	19	1.72043
	20	6.46837
	21	6.99659
	22	31.3965
	23	18.7708
	24	20.298
	25	8.64118
	26	6.11222
	27	12.5892
	28	19.4968
	29	24.592
	30	19.5008
	31	27.2793
	32	15.0485
	33	8.33333
